# Supplementary material for: Electric field induced band tuning, optical and thermoelectric responses in tetragonal germanene: a theoretical approach
Source: Royal Society of Chemistry journal article supplement (doi:10.1039/d0cp03892j), 2020-01-01
Supplement: d0cp03892j1.pdf [file d0cp03892j1.pdf]

Supplementary Information

**Electric field induced band tuning, optical and  
thermoelectric responses in tetragonal germanene: a  
theoretical approach**

Supriya Ghosal, Arka Bandyopadhyay, Debnarayan Jana\*

Department of Physics, University of Calcutta , 92, A. P. C. Road, Kolkata-700009, India.

\* Corresponding Author.

E-mail Address: [djphy@caluniv.ac.in](mailto:djphy@caluniv.ac.in)

Fax: 0091 033 2350 9755

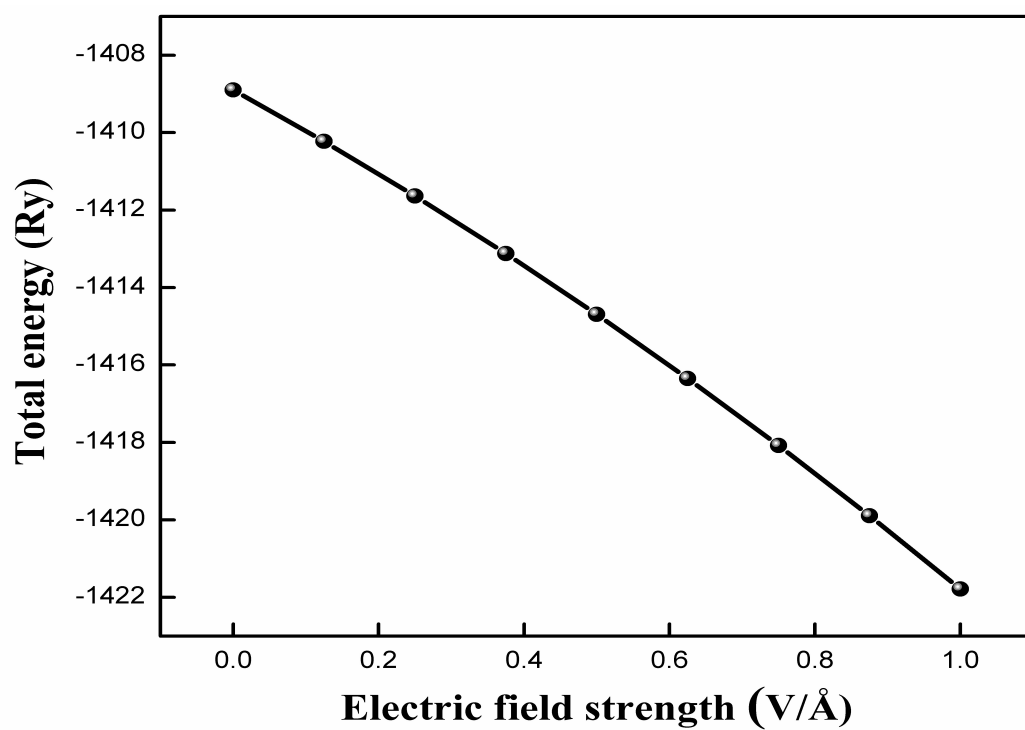

**Figure 1 : Variation of total energy of the T-Ge system as a function of external electric field strength.**

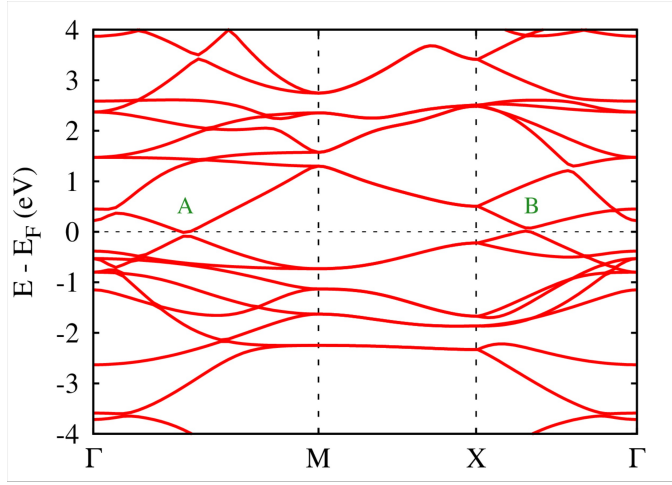

(a)

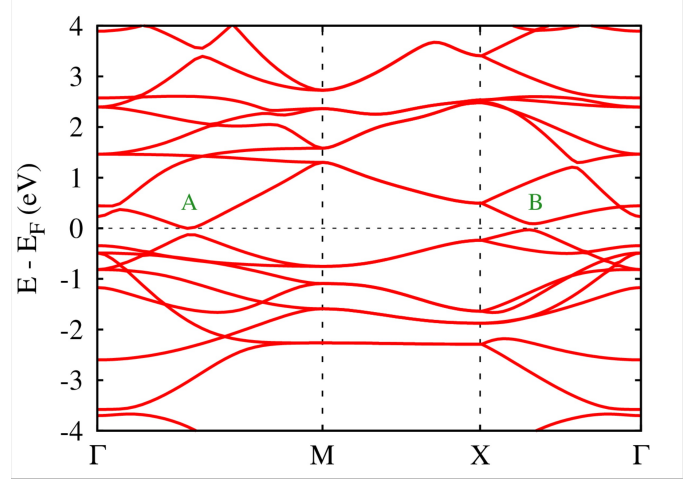

(b)

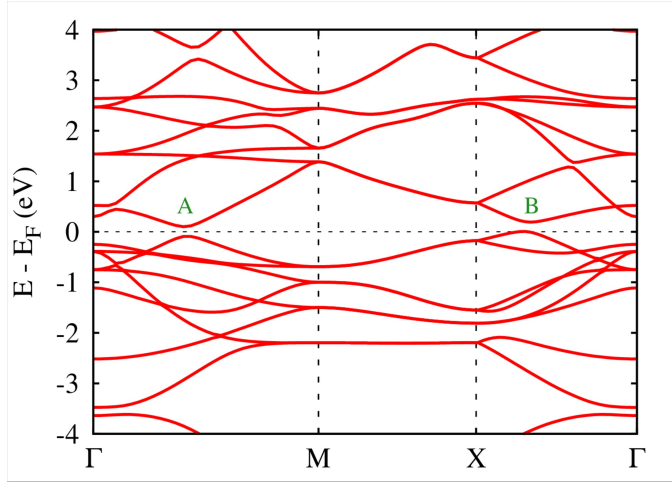

(c)

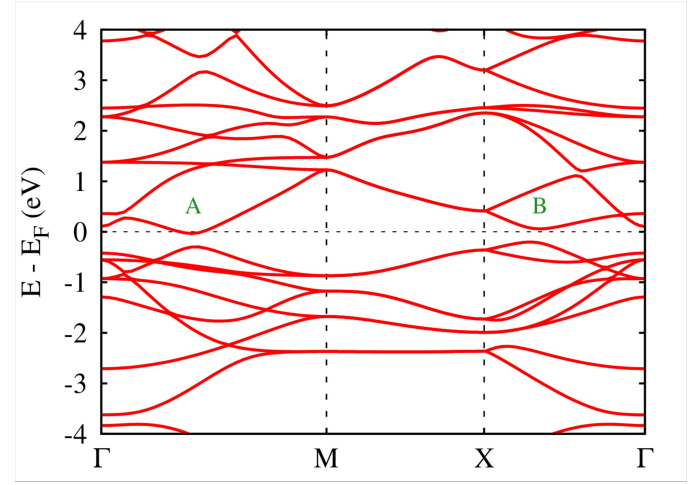

(d)

**Figure 2 : DFT bandstructure of T-Ge in presence of external electric field of strength (a) 0.125 V/Å, (b) 0.250 V/Å, (c) 0.375 V/Å and (d) 0.500 V/Å respectively.**

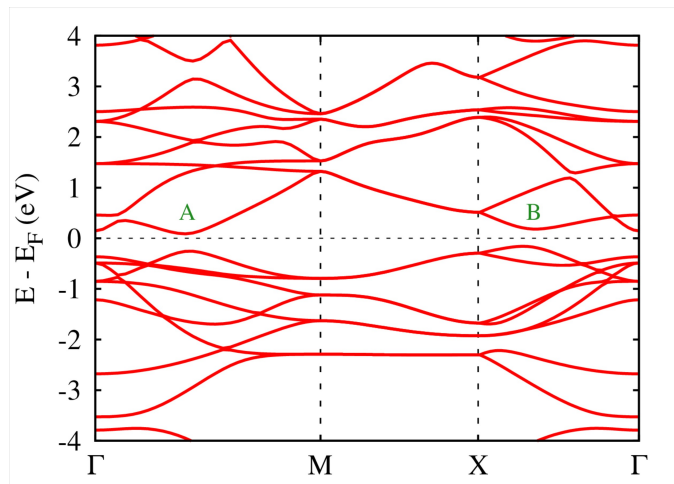

(a)

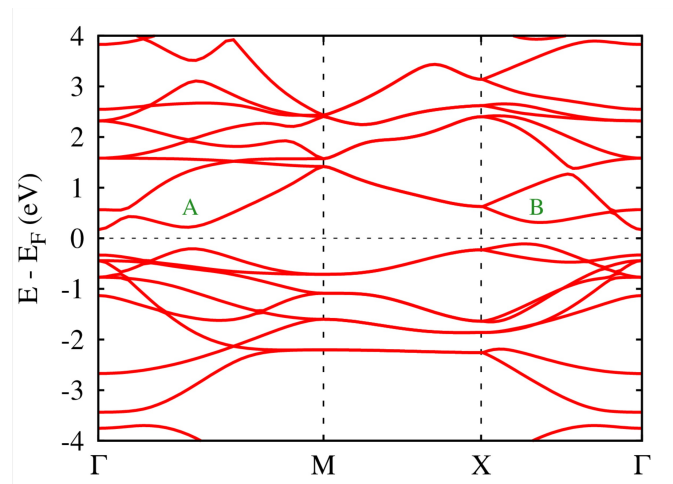

(b)

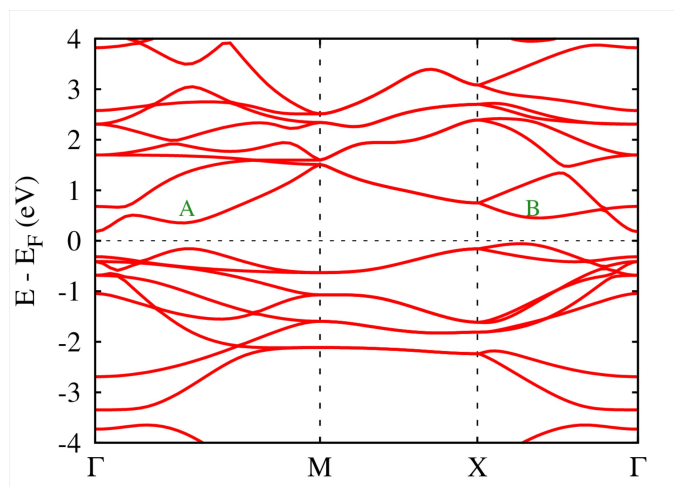

(c)

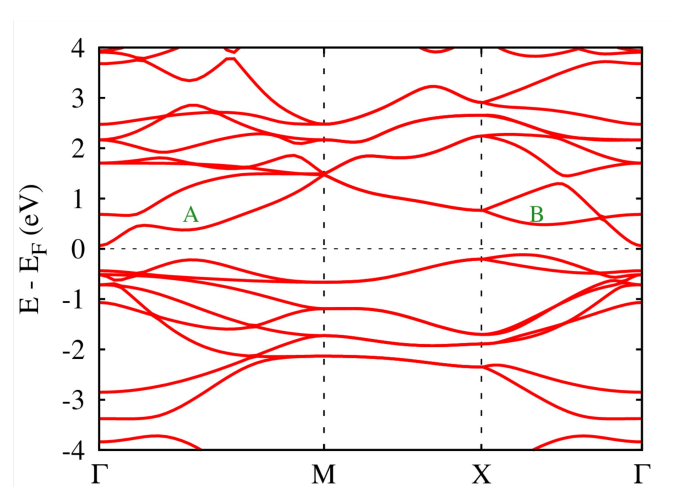

(d)

**Figure 3 : DFT bandstructure of T-Ge in presence of external electric field of strength (a) 0.625 V/Å, (b) 0.750 V/Å, (c) 0.875 V/Å and (d) 1.000 V/Å respectively.**
